# Supplementary material for: Virtual Reality-Delivered Mirror Visual Feedback and Exposure Therapy for FND: A Midpoint Report of a Randomized Controlled Feasibility Study
Source: Atypon-hosted journal article supplement (doi:10.1176/appi.neuropsych.19030071), 2019-11-05

**SUPPLEMENTARY TABLE S1. Demographics of the Samples<sup>a</sup>**

| Characteristic     | VR-INTERVENTION<br>(N=7) |      | CONTROL<br>(N=7) |      |
|--------------------|--------------------------|------|------------------|------|
|                    | Mean                     | SD   | Mean             | SD   |
| Age                | 42.3                     | 14.4 | 44.1             | 15.4 |
| Years of education | 14.7                     | 1.8  | 15.9             | 2.5  |

<sup>a</sup> SD: standard deviation

**SUPPLEMENTARY TABLE S2. Characteristics of the Samples**

| Characteristic                     | VR-INTERVENTION<br>(N=7) | CONTROL<br>(N=7) |
|------------------------------------|--------------------------|------------------|
|                                    | N                        | N                |
| Female                             | 6                        | 4                |
| Caucasian                          | 6                        | 6                |
| <sup>a</sup> Episodic Symptoms     | 6                        | 7                |
| Receiving Disability               | 3                        | 5                |
| <sup>b</sup> Comorbidities present | 3                        | 4                |
| <sup>c</sup> Identifiable Triggers | 5                        | 4                |

<sup>a</sup>Only a single subject had continuous symptoms that included gait difficulties. Two subjects in each group were classified as PNES. Only one subject had negative symptoms (weakness) in the active arm.

<sup>b</sup>Comorbid diagnoses included: Post-Traumatic Stress Disorder (N=4), Traumatic Brain Injury (N=1), Meneire's Disease (N=1), and Autism (N=1).

<sup>c</sup>Triggers included: Seeing someone fall, football stadiums, narrow hallways, band practice, crowds, African American culture, cars, military combat sounds, financial transactions

**Supplementary Figure S1.**  
**2019 PRELIMINARY CONSORT FLOW DIAGRAM**  
**(target N=30)**

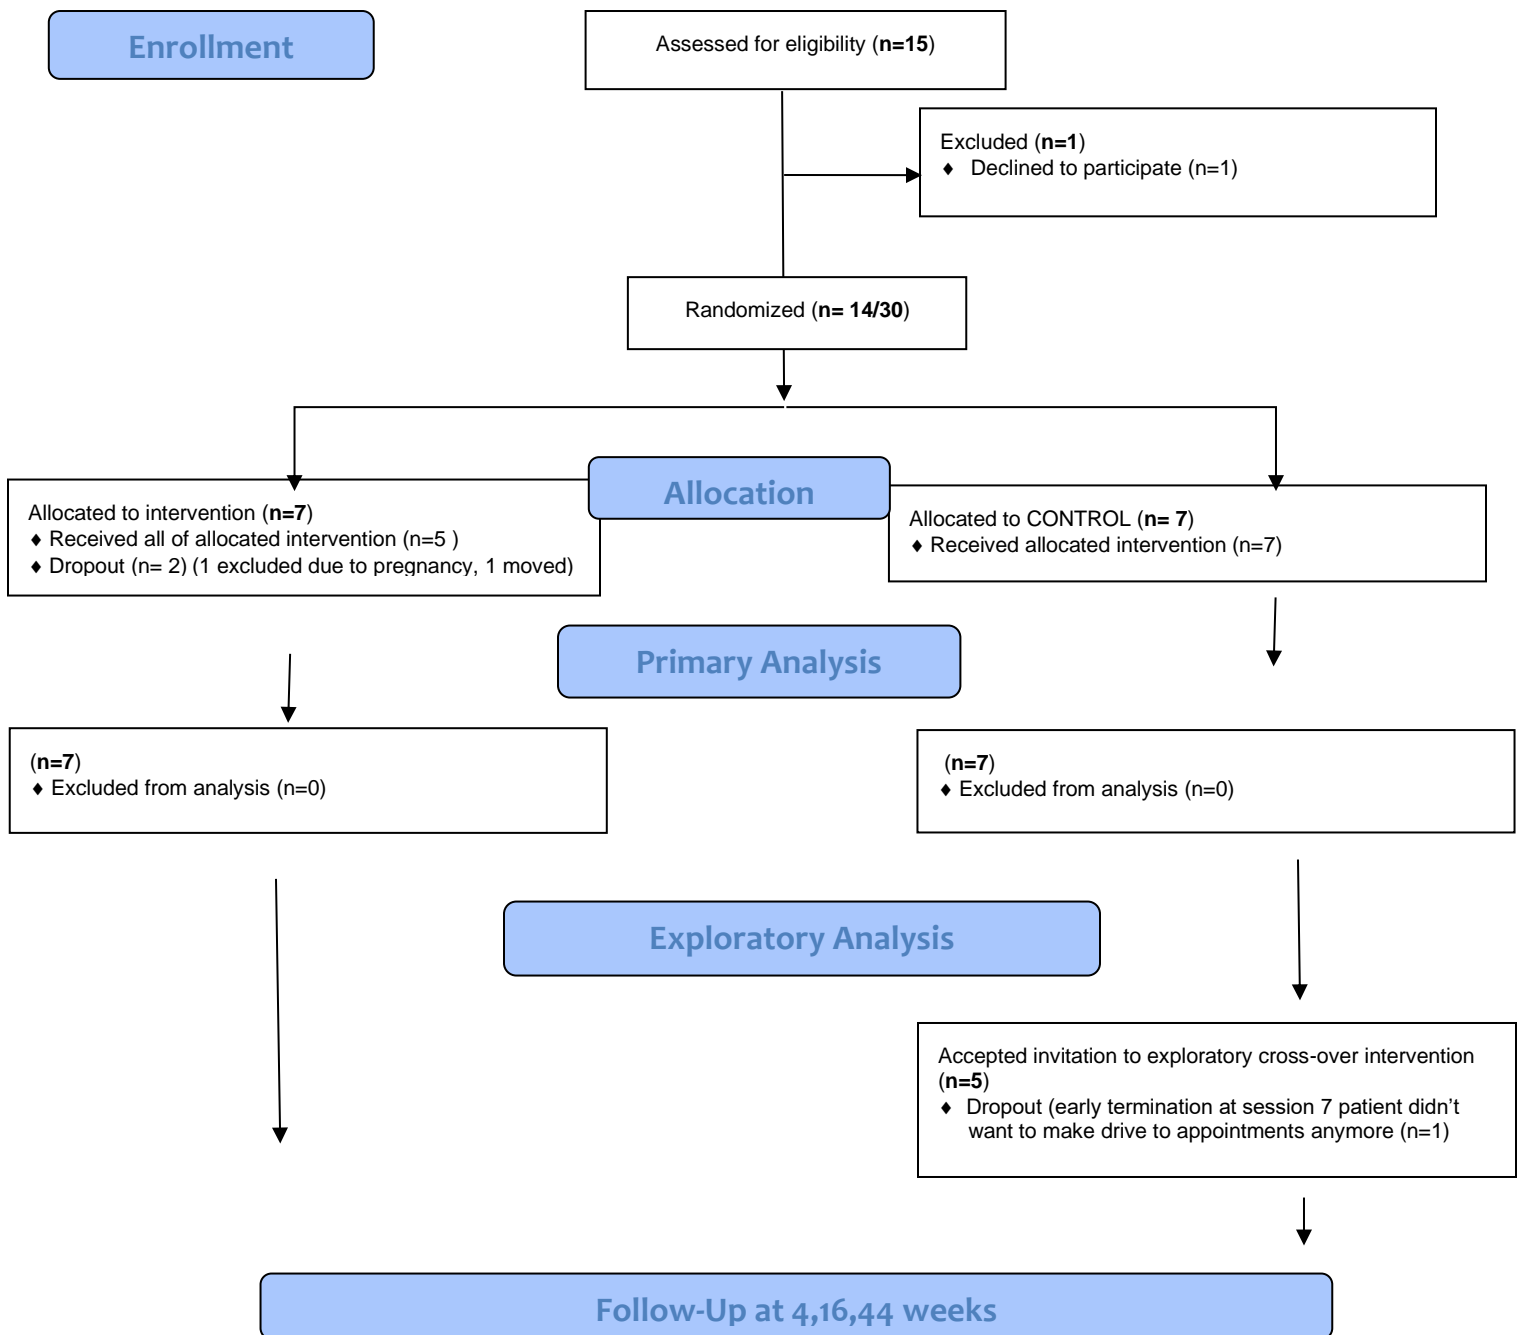

Supplementary Figure S2. Mean Symptom Frequency per week

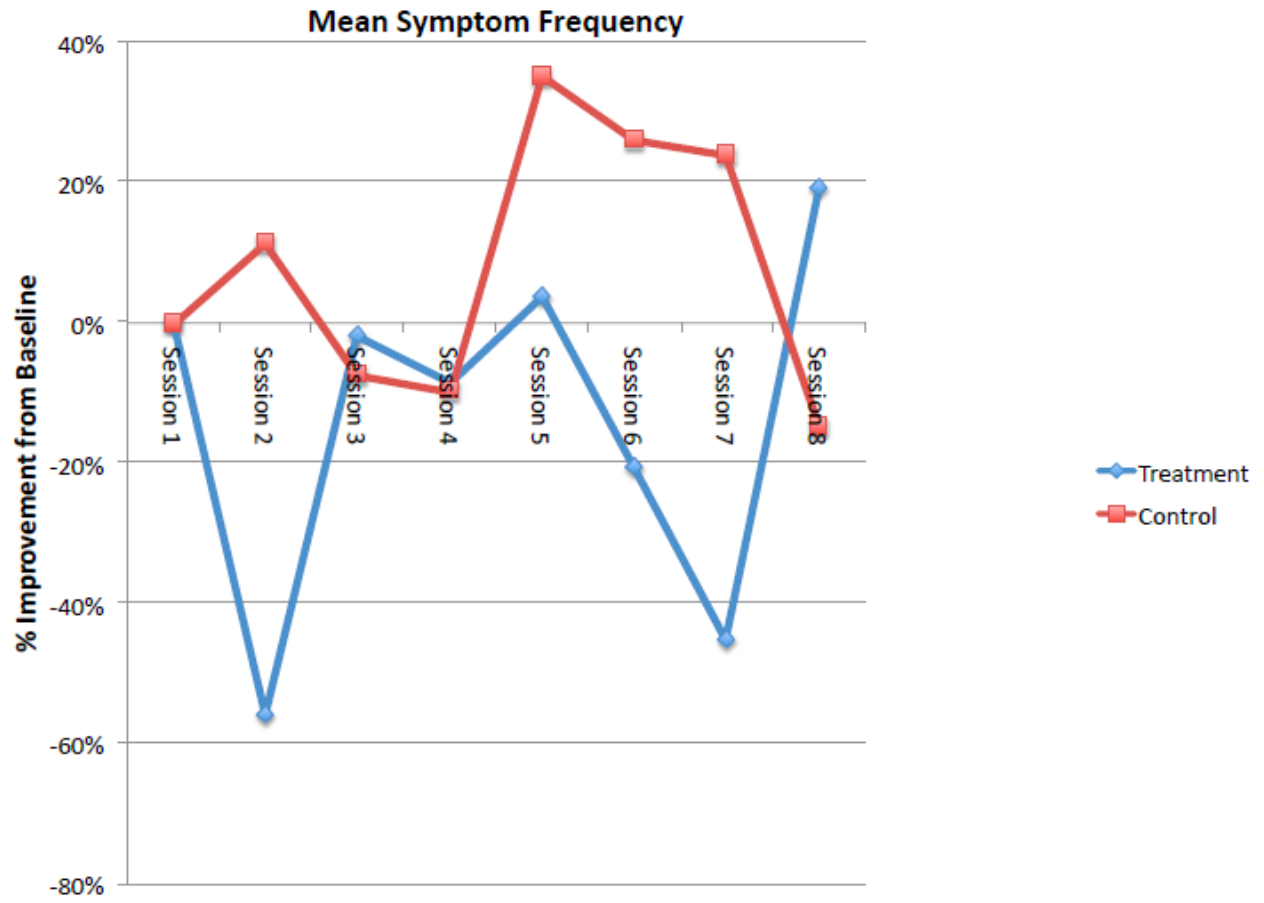

Supplement: appi.neuropsych.19030071.ds001.pdf [file appi.neuropsych.19030071.ds001.pdf]
